# Supplementary material for: Experimental evidence of new tetragonal polymorphs of silicon formed through ultrafast laser-induced confined microexplosion
Source: PubMed Central journal article supplement (PMC4491821; doi:10.1038/ncomms8555), 2015-06-29
Supplement: ncomms8555-s1.pdf [file ncomms8555-s1.pdf]

## Supplementary Figures

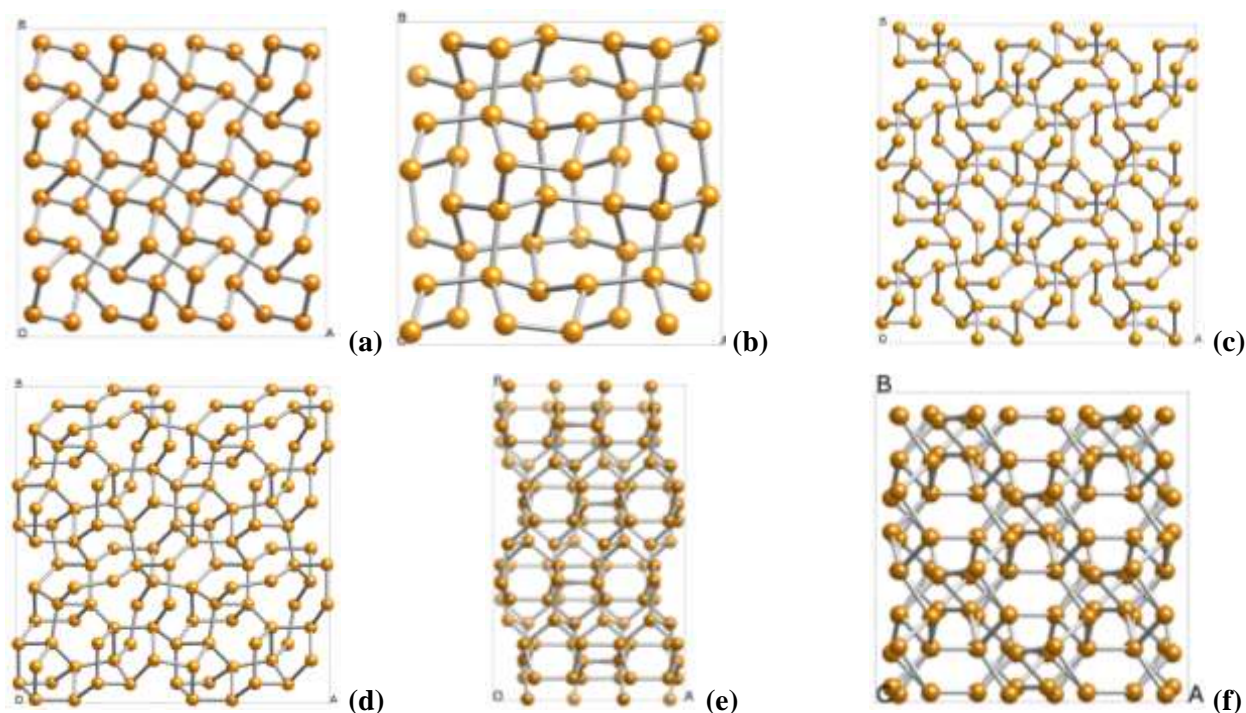

**Supplementary Figure 1 | Crystal structure of new phases.** The structures are uncovered in the AIRSS searches and the new d-spacings were then calculated using the reflection conditions<sup>1,2</sup> (see Table 4 in the main text). The 3D animations showing different angles of view, prepared with CrystalMaker: (a) – bt8-Si ( $I41a$ ), Supplementary Movie 1; (b) – st12-Si ( $P4_32_12$ ), Supplementary Movie 2; (c) – t32-Si ( $P-421c$ ), Supplementary Movie 3; (d) – t32\*-Si ( $P4_32_12$ ), Supplementary Movie 4; (e) – m32 ( $P2_1c$ ), Supplementary Movie 5; (f) – m32\* ( $C2$ ), Supplementary Movie 6. The corresponding .cif files for the new phases can be found here:

Suppl-Fig1a\_bt8-Si

Suppl-Fig1b\_st12-Si

Suppl-Fig1c\_t32-Si

Suppl-Fig1d\_t32\*-Si

Suppl-Fig1e\_m32-Si

Suppl-Fig1f\_m32\*-Si

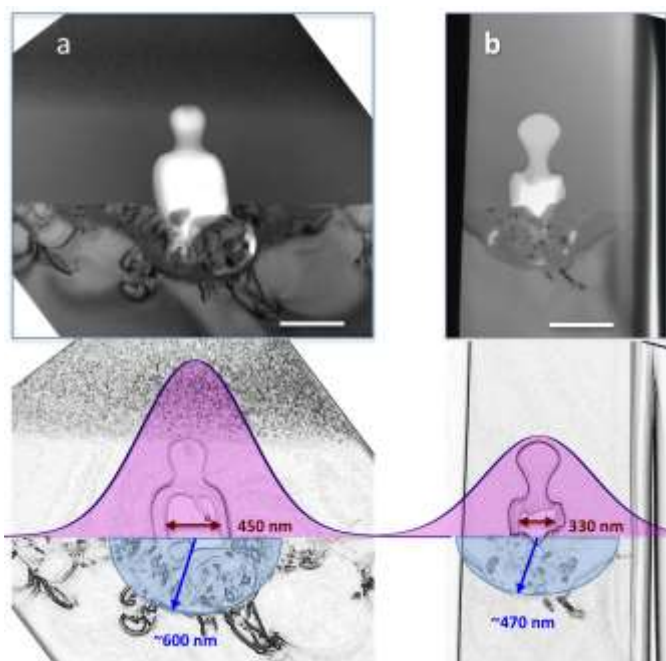

**Supplementary Figure 2 | TEM images of the laser-produced voids and shock-wave affected areas.**

The laser fluences in the experiments were  $\sim 95 \text{ J cm}^{-2}$  at the laser energy  $\sim 440 \text{ nJ}$  (a) and  $60 \text{ J cm}^{-2}$  at  $\sim 250 \text{ nJ}$  (b); the scale bars are  $500 \text{ nm}$ . Below are the same images with tracing contours for better visibility of the areas with indication of the Gaussian shapes of the intensity distribution of the laser intensity on the Si-surface with  $740 \text{ nm}$  at the FWHM level. The diameter of the voids in  $\text{SiO}_2$  are  $\sim 450 \text{ nm}$  and  $\sim 330 \text{ nm}$  respectively. The half-ellipsoid contours show the shock-wave affected volume in Si with  $r_{SW} = \sim 600 \text{ nm}$  (a) and  $470 \text{ nm}$  (b). The laser pulse is coming from the top.

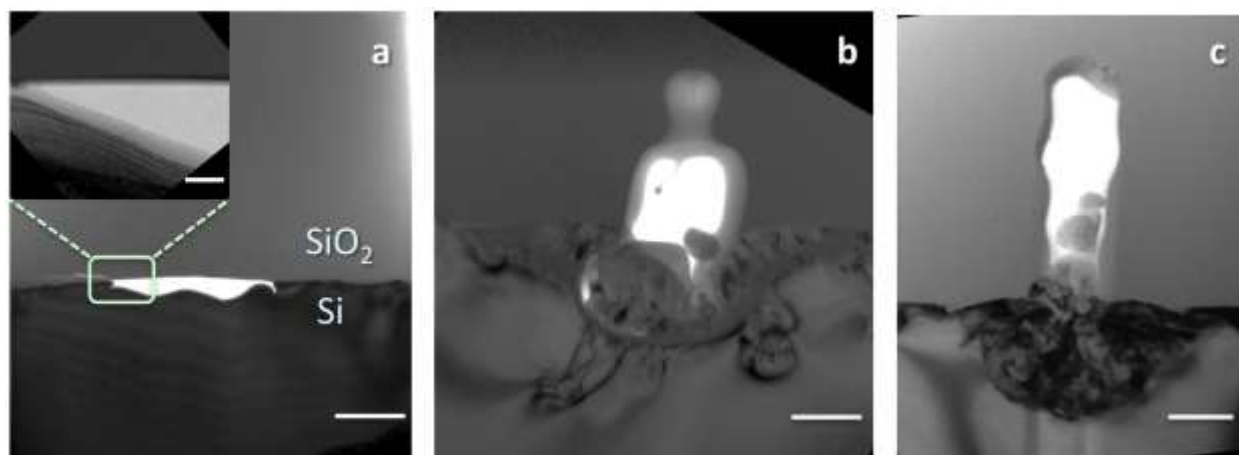

**Supplementary Figure 3 | Void formation at various laser fluences.** Examples of TEM images of voids formed at the Si/SiO<sub>2</sub> interface at a laser fluence range from 2 J cm<sup>-2</sup> (**a**) to 95 J cm<sup>-2</sup> (**b**) to 150 J cm<sup>-2</sup> (**c**). The shock-wave affected area contains only amorphous Si at 2 J/cm<sup>2</sup>, while tetragonal Si-phases were found in the shock-wave affected areas at the laser fluences between 40 J/cm<sup>2</sup> and 150 J/cm<sup>2</sup>. The laser pulse is coming from the top, the scale bars are 1 μm and 100 nm in the inset in (**a**), 300 nm in (**b,c**).

### Supplementary Tables

**Supplementary Table 1.** D-spacings in [Å] of the tetragonal bt8-Si structure at various pressures calculated using the appropriate reflection conditions<sup>2</sup>.

| space group $I4_1/a$<br>(hkl) | 0 GPa | 2 GPa | 4 GPa | 8 GPa | 16 GPa |
|-------------------------------|-------|-------|-------|-------|--------|
| 101                           | 4.665 | 4.623 | 4.585 | 4.519 | 4.409  |
| 200                           | 3.338 | 3.316 | 3.296 | 3.261 | 3.203  |
| 211                           | 2.715 | 2.694 | 2.676 | 2.644 | 2.591  |
| 112                           | 2.683 | 2.657 | 2.633 | 2.592 | 2.524  |
| 220                           | 2.360 | 2.345 | 2.331 | 2.306 | 2.265  |
| 022                           | 2.333 | 2.311 | 2.292 | 2.259 | 2.205  |
| 301                           | 2.106 | 2.091 | 2.078 | 2.054 | 2.015  |
| 103                           | 2.067 | 2.044 | 2.024 | 1.989 | 1.932  |
| 231                           | 1.781 | 1.769 | 1.758 | 1.738 | 1.705  |
| 132                           | 1.772 | 1.758 | 1.745 | 1.723 | 1.686  |
| 213                           | 1.758 | 1.740 | 1.725 | 1.698 | 1.654  |
| 400                           | 1.669 | 1.658 | 1.648 | 1.630 | 1.601  |
| 004                           | 1.631 | 1.612 | 1.595 | 1.567 | 1.520  |
| 411                           | 1.572 | 1.561 | 1.551 | 1.534 | 1.505  |
| 033                           | 1.555 | 1.541 | 1.528 | 1.506 | 1.470  |
| 114                           | 1.541 | 1.524 | 1.509 | 1.483 | 1.441  |
| 422                           | 1.357 | 1.347 | 1.338 | 1.322 | 1.296  |

**Supplementary Table 2.** D-spacings in [Å] of the tetragonal st12-Si structure at various pressures calculated using the appropriate reflection conditions<sup>2</sup>.

| space group $P4_32_12$<br>(hkl) | 0 GPa | 2 GPa | 4 GPa | 8 GPa | 16 GPa |
|---------------------------------|-------|-------|-------|-------|--------|
| 101                             | 4.365 | 4.324 | 4.286 | 4.217 | 4.102  |
| 110                             | 4.015 | 3.988 | 3.964 | 3.917 | 3.832  |
| 111                             | 3.461 | 3.432 | 3.405 | 3.356 | 3.271  |
| 012                             | 2.925 | 2.891 | 2.860 | 2.804 | 2.716  |
| 200                             | 2.839 | 2.820 | 2.803 | 2.770 | 2.710  |
| 201                             | 2.621 | 2.601 | 2.583 | 2.548 | 2.488  |
| 112                             | 2.600 | 2.573 | 2.547 | 2.502 | 2.428  |
| 210                             | 2.540 | 2.523 | 2.507 | 2.478 | 2.424  |
| 211                             | 2.380 | 2.362 | 2.346 | 2.315 | 2.261  |
| 022                             | 2.183 | 2.162 | 2.143 | 2.109 | 2.051  |
| 013                             | 2.112 | 2.086 | 2.061 | 2.019 | 1.952  |
| 220                             | 2.008 | 1.994 | 1.982 | 1.959 | 1.916  |
| 113                             | 1.979 | 1.956 | 1.935 | 1.897 | 1.836  |
| 221                             | 1.926 | 1.912 | 1.899 | 1.875 | 1.833  |
| 031                             | 1.824 | 1.811 | 1.799 | 1.776 | 1.736  |
| 310                             | 1.796 | 1.784 | 1.773 | 1.752 | 1.714  |
| 023                             | 1.775 | 1.756 | 1.739 | 1.707 | 1.656  |
| 311                             | 1.737 | 1.724 | 1.713 | 1.692 | 1.653  |
| 222                             | 1.730 | 1.716 | 1.702 | 1.678 | 1.636  |
| 004                             | 1.706 | 1.683 | 1.662 | 1.626 | 1.569  |
| 123                             | 1.695 | 1.677 | 1.660 | 1.631 | 1.584  |
| 032                             | 1.655 | 1.642 | 1.629 | 1.606 | 1.566  |
| 312                             | 1.589 | 1.576 | 1.564 | 1.542 | 1.504  |
| 321                             | 1.535 | 1.524 | 1.514 | 1.495 | 1.462  |
| 322                             | 1.430 | 1.419 | 1.408 | 1.389 | 1.356  |
| 133                             | 1.410 | 1.396 | 1.384 | 1.363 | 1.326  |

**Supplementary Table 3.** D-spacings in [Å] of the tetragonal t32-Si structure at various pressures calculated using the appropriate reflection conditions<sup>2</sup>.

| space group <i>P-421c</i><br>(hkl) | 0 GPa | 2 GPa | 4 GPa | 8 GPa | 16 GPa |
|------------------------------------|-------|-------|-------|-------|--------|
| 110                                | 6.653 | 6.601 | 6.554 | 6.472 | 6.335  |
| 101                                | 5.428 | 5.388 | 5.351 | 5.285 | 5.175  |
| 210                                | 4.208 | 4.175 | 4.145 | 4.093 | 4.007  |
| 211                                | 3.555 | 3.528 | 3.503 | 3.460 | 3.387  |
| 002                                | 3.323 | 3.299 | 3.277 | 3.237 | 3.170  |
| 102                                | 3.133 | 3.110 | 3.089 | 3.051 | 2.989  |
| 112                                | 2.973 | 2.951 | 2.931 | 2.895 | 2.835  |
| 031                                | 2.836 | 2.814 | 2.795 | 2.760 | 2.702  |
| 131                                | 2.716 | 2.695 | 2.676 | 2.642 | 2.587  |
| 022                                | 2.714 | 2.694 | 2.675 | 2.643 | 2.588  |
| 230                                | 2.609 | 2.589 | 2.571 | 2.539 | 2.485  |
| 122                                | 2.608 | 2.588 | 2.570 | 2.539 | 2.486  |
| 231                                | 2.429 | 2.410 | 2.393 | 2.363 | 2.313  |
| 400                                | 2.352 | 2.334 | 2.317 | 2.288 | 2.240  |
| 222                                | 2.351 | 2.333 | 2.317 | 2.288 | 2.241  |
| 410                                | 2.282 | 2.264 | 2.248 | 2.220 | 2.173  |
| 032                                | 2.281 | 2.264 | 2.248 | 2.220 | 2.174  |
| 330                                | 2.218 | 2.200 | 2.185 | 2.157 | 2.112  |
| 041                                | 2.217 | 2.200 | 2.185 | 2.157 | 2.112  |
| 312                                | 2.217 | 2.200 | 2.185 | 2.158 | 2.112  |
| 411                                | 2.158 | 2.142 | 2.126 | 2.100 | 2.055  |
| 013                                | 2.156 | 2.141 | 2.126 | 2.100 | 2.057  |
| 322                                | 2.052 | 2.037 | 2.023 | 1.997 | 1.956  |
| 241                                | 2.006 | 1.990 | 1.976 | 1.951 | 1.910  |
| 023                                | 2.004 | 1.989 | 1.976 | 1.952 | 1.911  |
| 123                                | 1.960 | 1.946 | 1.932 | 1.909 | 1.869  |
| 430                                | 1.882 | 1.867 | 1.854 | 1.831 | 1.792  |
| 412                                | 1.881 | 1.867 | 1.854 | 1.831 | 1.792  |
| 332                                | 1.845 | 1.831 | 1.818 | 1.795 | 1.757  |
| 341                                | 1.811 | 1.797 | 1.784 | 1.761 | 1.724  |
| 242                                | 1.778 | 1.764 | 1.752 | 1.730 | 1.693  |
| 133                                | 1.777 | 1.764 | 1.751 | 1.730 | 1.694  |
| 233                                | 1.689 | 1.676 | 1.665 | 1.644 | 1.610  |
| 004                                | 1.663 | 1.650 | 1.639 | 1.618 | 1.585  |
| 342                                | 1.637 | 1.625 | 1.613 | 1.593 | 1.560  |
| 104                                | 1.636 | 1.624 | 1.613 | 1.594 | 1.561  |
| 114                                | 1.612 | 1.600 | 1.589 | 1.570 | 1.538  |
| 143                                | 1.590 | 1.578 | 1.567 | 1.547 | 1.515  |
| 024                                | 1.567 | 1.555 | 1.545 | 1.526 | 1.494  |
| 124                                | 1.545 | 1.534 | 1.524 | 1.505 | 1.474  |
| 243                                | 1.526 | 1.514 | 1.504 | 1.485 | 1.454  |
| 224                                | 1.486 | 1.475 | 1.465 | 1.447 | 1.418  |
| 343                                | 1.434 | 1.423 | 1.413 | 1.396 | 1.367  |
| 324                                | 1.402 | 1.391 | 1.382 | 1.365 | 1.336  |
| 044                                | 1.357 | 1.347 | 1.338 | 1.321 | 1.294  |
| 144                                | 1.343 | 1.333 | 1.324 | 1.308 | 1.281  |
| 424                                | 1.304 | 1.294 | 1.285 | 1.269 | 1.243  |

|     |       |       |       |       |       |
|-----|-------|-------|-------|-------|-------|
| 800 | 1.176 | 1.167 | 1.159 | 1.144 | 1.120 |
| 444 | 1.175 | 1.167 | 1.159 | 1.144 | 1.120 |

**Supplementary Table 4.** D-spacings in [Å] of the tetragonal t32\*-Si structure at various pressures calculated using the appropriate reflection conditions<sup>2</sup>.

| space group $P4_32_12$<br>(hkl) | 0 GPa | 2 GPa | 4 GPa | 8 GPa | 16 GPa |
|---------------------------------|-------|-------|-------|-------|--------|
| 110                             | 6.649 | 6.597 | 6.551 | 6.469 | 6.333  |
| 101                             | 5.432 | 5.392 | 5.355 | 5.289 | 5.180  |
| 111                             | 4.704 | 4.668 | 4.636 | 4.579 | 4.484  |
| 200                             | 4.701 | 4.665 | 4.632 | 4.574 | 4.478  |
| 210                             | 4.205 | 4.173 | 4.143 | 4.091 | 4.005  |
| 021                             | 3.840 | 3.811 | 3.784 | 3.737 | 3.659  |
| 211                             | 3.555 | 3.528 | 3.503 | 3.460 | 3.388  |
| 220                             | 3.324 | 3.299 | 3.275 | 3.234 | 3.166  |
| 012                             | 3.137 | 3.114 | 3.093 | 3.055 | 2.992  |
| 112                             | 2.976 | 2.954 | 2.934 | 2.898 | 2.838  |
| 221                             | 2.974 | 2.951 | 2.931 | 2.894 | 2.834  |
| 310                             | 2.973 | 2.950 | 2.930 | 2.893 | 2.832  |
| 301                             | 2.836 | 2.814 | 2.794 | 2.759 | 2.702  |
| 202                             | 2.716 | 2.696 | 2.677 | 2.645 | 2.590  |
| 311                             | 2.715 | 2.694 | 2.675 | 2.642 | 2.587  |
| 122                             | 2.609 | 2.590 | 2.572 | 2.541 | 2.488  |
| 320                             | 2.608 | 2.588 | 2.569 | 2.537 | 2.484  |
| 321                             | 2.428 | 2.410 | 2.393 | 2.363 | 2.313  |
| 222                             | 2.352 | 2.334 | 2.318 | 2.290 | 2.242  |
| 400                             | 2.351 | 2.333 | 2.316 | 2.287 | 2.239  |
| 032                             | 2.282 | 2.264 | 2.249 | 2.221 | 2.175  |
| 140                             | 2.281 | 2.263 | 2.247 | 2.219 | 2.172  |
| 132                             | 2.217 | 2.201 | 2.185 | 2.158 | 2.113  |
| 041                             | 2.217 | 2.200 | 2.184 | 2.157 | 2.112  |
| 330                             | 2.216 | 2.199 | 2.184 | 2.156 | 2.111  |
| 013                             | 2.159 | 2.143 | 2.129 | 2.103 | 2.060  |
| 411                             | 2.157 | 2.141 | 2.126 | 2.099 | 2.055  |
| 113                             | 2.104 | 2.089 | 2.075 | 2.050 | 2.007  |
| 331                             | 2.103 | 2.087 | 2.072 | 2.046 | 2.003  |
| 322                             | 2.053 | 2.037 | 2.023 | 1.998 | 1.956  |
| 023                             | 2.006 | 1.991 | 1.978 | 1.954 | 1.914  |
| 421                             | 2.005 | 1.989 | 1.975 | 1.951 | 1.910  |
| 123                             | 1.962 | 1.948 | 1.934 | 1.911 | 1.871  |
| 042                             | 1.920 | 1.905 | 1.892 | 1.869 | 1.830  |
| 142                             | 1.881 | 1.867 | 1.854 | 1.831 | 1.793  |
| 340                             | 1.881 | 1.866 | 1.853 | 1.830 | 1.791  |
| 223                             | 1.845 | 1.832 | 1.819 | 1.797 | 1.760  |
| 332                             | 1.845 | 1.831 | 1.818 | 1.795 | 1.758  |
| 033                             | 1.811 | 1.797 | 1.785 | 1.763 | 1.727  |
| 341                             | 1.810 | 1.796 | 1.783 | 1.761 | 1.724  |
| 133                             | 1.778 | 1.765 | 1.753 | 1.731 | 1.695  |
| 422                             | 1.778 | 1.764 | 1.752 | 1.730 | 1.694  |
| 233                             | 1.690 | 1.677 | 1.666 | 1.645 | 1.611  |
| 004                             | 1.664 | 1.652 | 1.641 | 1.621 | 1.587  |
| 440                             | 1.662 | 1.649 | 1.638 | 1.617 | 1.583  |
| 104                             | 1.638 | 1.626 | 1.615 | 1.596 | 1.563  |



|     |       |       |       |       |       |
|-----|-------|-------|-------|-------|-------|
| 342 | 1.637 | 1.625 | 1.613 | 1.593 | 1.560 |
| 114 | 1.614 | 1.602 | 1.591 | 1.572 | 1.540 |
| 043 | 1.613 | 1.601 | 1.590 | 1.571 | 1.538 |
| 441 | 1.613 | 1.600 | 1.589 | 1.569 | 1.536 |
| 143 | 1.590 | 1.578 | 1.567 | 1.548 | 1.516 |
| 024 | 1.569 | 1.557 | 1.546 | 1.528 | 1.496 |
| 124 | 1.547 | 1.536 | 1.525 | 1.507 | 1.476 |
| 423 | 1.526 | 1.515 | 1.504 | 1.486 | 1.455 |
| 224 | 1.488 | 1.477 | 1.467 | 1.449 | 1.419 |
| 034 | 1.470 | 1.459 | 1.449 | 1.431 | 1.402 |
| 314 | 1.452 | 1.441 | 1.431 | 1.414 | 1.385 |
| 324 | 1.403 | 1.392 | 1.383 | 1.366 | 1.338 |
| 044 | 1.358 | 1.348 | 1.339 | 1.322 | 1.295 |
| 144 | 1.344 | 1.334 | 1.325 | 1.309 | 1.282 |
| 443 | 1.330 | 1.320 | 1.311 | 1.295 | 1.268 |
| 424 | 1.305 | 1.295 | 1.286 | 1.270 | 1.244 |
| 434 | 1.246 | 1.237 | 1.228 | 1.213 | 1.188 |
| 444 | 1.176 | 1.167 | 1.159 | 1.145 | 1.121 |
| 800 | 1.175 | 1.166 | 1.158 | 1.144 | 1.120 |

**Supplementary Table 5.** D-spacings in [Å] of the monoclinic m32-Si structure at various pressures calculated using the appropriate reflection conditions<sup>2</sup>.

| space group $P2_1c$<br>(hkl) | 0 GPa | 2 GPa | 4 GPa | 8 GPa | 16 GPa |
|------------------------------|-------|-------|-------|-------|--------|
| 011                          | 7.076 | 7.019 | 6.967 | 6.876 | 6.727  |
| 100                          | 5.675 | 5.632 | 5.591 | 5.519 | 5.391  |
| 002                          | 5.435 | 5.396 | 5.360 | 5.297 | 5.194  |
| 110                          | 4.848 | 4.809 | 4.773 | 4.710 | 4.601  |
| 012                          | 4.695 | 4.659 | 4.627 | 4.570 | 4.477  |
| 111                          | 4.695 | 4.658 | 4.625 | 4.566 | 4.466  |
| 020                          | 4.661 | 4.620 | 4.583 | 4.566 | 4.415  |
| 102                          | 4.319 | 4.288 | 4.260 | 4.210 | 4.126  |
| 021                          | 4.284 | 4.247 | 4.214 | 4.157 | 4.126  |
| 112                          | 3.919 | 3.889 | 3.863 | 3.816 | 3.738  |
| 120                          | 3.602 | 3.572 | 3.545 | 3.497 | 3.415  |
| 022                          | 3.538 | 3.509 | 3.483 | 3.438 | 3.364  |
| 121                          | 3.538 | 3.509 | 3.483 | 3.436 | 3.359  |
| 013                          | 3.377 | 3.352 | 3.329 | 3.289 | 3.223  |
| 122                          | 3.168 | 3.143 | 3.120 | 3.080 | 3.014  |
| 113                          | 3.134 | 3.111 | 3.091 | 3.054 | 2.994  |
| 031                          | 2.987 | 2.962 | 2.938 | 2.898 | 2.832  |
| 023                          | 2.861 | 2.861 | 2.818 | 2.782 | 2.724  |
| 200                          | 2.838 | 2.816 | 2.796 | 2.759 | 2.695  |
| 211                          | 2.743 | 2.722 | 2.703 | 2.668 | 2.608  |
| 130                          | 2.725 | 2.702 | 2.681 | 2.645 | 2.583  |
| 004                          | 2.718 | 2.698 | 2.680 | 2.648 | 2.597  |
| 202                          | 2.717 | 2.697 | 2.678 | 2.646 | 2.588  |
| 210                          | 2.715 | 2.693 | 2.674 | 2.639 | 2.578  |
| 123                          | 2.708 | 2.688 | 2.669 | 2.636 | 2.582  |
| 032                          | 2.697 | 2.675 | 2.654 | 2.619 | 2.561  |
| 131                          | 2.697 | 2.675 | 2.654 | 2.618 | 2.558  |
| 104                          | 2.636 | 2.618 | 2.601 | 2.571 | 2.522  |
| 014                          | 2.609 | 2.590 | 2.572 | 2.541 | 2.491  |
| 212                          | 2.608 | 2.589 | 2.571 | 2.539 | 2.484  |
| 114                          | 2.537 | 2.518 | 2.502 | 2.473 | 2.425  |
| 132                          | 2.522 | 2.502 | 2.483 | 2.450 | 2.396  |
| 221                          | 2.444 | 2.425 | 2.407 | 2.376 | 2.322  |
| 220                          | 2.424 | 2.404 | 2.387 | 2.355 | 2.301  |
| 213                          | 2.370 | 2.353 | 2.337 | 2.309 | 2.261  |
| 033                          | 2.359 | 2.340 | -     | 2.292 | 2.242  |
| 024                          | 2.348 | 2.330 | 2.313 | 2.285 | 2.238  |
| 222                          | 2.347 | 2.329 | 2.313 | 2.283 | 2.233  |
| 040                          | 2.330 | 2.310 | 2.292 | 2.260 | 2.207  |
| 124                          | 2.295 | 2.277 | 2.262 | 2.235 | 2.190  |
| 041                          | 2.279 | 2.259 | 2.241 | 2.210 | 2.159  |
| 133                          | 2.271 | 2.253 | 2.237 | 2.208 | 2.161  |
| 223                          | 2.169 | 2.153 | 2.138 | 2.111 | 2.066  |
| 204                          | 2.159 | 2.144 | 2.130 | 2.105 | 2.063  |
| 140                          | 2.156 | 2.137 | 2.120 | 2.091 | 2.043  |
| 042                          | 2.142 | 2.124 | 2.107 | 2.078 | 2.031  |

|     |       |       |       |       |       |
|-----|-------|-------|-------|-------|-------|
| 141 | 2.142 | 2.123 | 2.107 | 2.078 | 2.030 |
| 231 | 2.108 | 2.091 | 2.076 | 2.048 | 2.001 |
| 214 | 2.104 | 2.088 | 2.075 | 2.050 | 2.009 |
| 230 | 2.095 | 2.078 | 2.063 | 2.035 | 1.988 |
| 142 | 2.051 | 2.034 | 2.018 | 1.991 | 1.946 |
| 034 | 2.046 | 2.029 | 2.015 | 1.989 | 1.947 |
| 232 | 2.045 | 2.029 | 2.014 | 1.988 | 1.944 |
| 134 | 2.010 | 1.995 | 1.980 | 1.956 | 1.915 |
| 043 | 1.960 | 1.944 | 1.929 | 1.903 | 1.861 |
| 224 | 1.959 | 1.945 | 1.932 | 1.908 | 1.869 |
| 233 | 1.924 | 1.909 | 1.896 | 1.871 | 1.831 |
| 143 | 1.909 | 1.893 | 1.879 | 1.854 | 1.814 |
| 302 | 1.892 | 1.878 | 1.865 | 1.841 | 1.800 |
| 300 | 1.892 | 1.877 | 1.864 | 1.840 | 1.797 |
| 311 | 1.882 | 1.867 | 1.854 | 1.830 | 1.788 |
| 312 | 1.854 | 1.840 | 1.827 | 1.804 | 1.764 |
| 310 | 1.854 | 1.840 | 1.826 | 1.803 | 1.761 |
| 241 | 1.809 | 1.794 | 1.781 | 1.757 | 1.716 |
| 240 | 1.801 | 1.786 | 1.772 | 1.748 | 1.708 |
| 313 | 1.778 | 1.765 | 1.753 | 1.731 | 1.694 |
| 321 | 1.776 | 1.762 | 1.750 | 1.727 | 1.687 |
| 234 | 1.773 | 1.76  | 1.747 | 1.725 | 1.689 |
| 044 | 1.769 | 1.755 | 1.742 | 1.719 | 1.682 |
| 242 | 1.769 | 1.754 | 1.741 | 1.718 | 1.680 |
| 322 | 1.753 | 1.739 | 1.727 | 1.705 | 1.664 |
| 320 | 1.753 | 1.739 | 1.726 | 1.704 | 1.664 |
| 144 | 1.746 | 1.732 | 1.719 | 1.697 | 1.661 |
| 304 | 1.697 | 1.685 | 1.674 | 1.653 | 1.619 |
| 243 | 1.689 | 1.676 | 1.663 | 1.653 | 1.605 |
| 323 | 1.688 | 1.675 | 1.664 | 1.643 | 1.607 |
| 314 | 1.670 | 1.658 | 1.646 | 1.626 | 1.592 |
| 331 | 1.634 | 1.621 | 1.609 | 1.588 | 1.552 |
| 332 | 1.616 | 1.603 | 1.592 | 1.571 | 1.536 |
| 330 | 1.616 | 1.603 | 1.591 | 1.570 | 1.534 |
| 324 | 1.595 | 1.583 | 1.572 | 1.553 | 1.520 |
| 244 | 1.584 | 1.571 | 1.560 | 1.540 | 1.507 |
| 333 | 1.565 | 1.553 | 1.542 | 1.522 | 1.489 |
| 334 | 1.490 | 1.478 | 1.468 | 1.450 | 1.489 |
| 341 | 1.482 | 1.470 | 1.459 | 1.440 | 1.407 |
| 342 | 1.469 | 1.457 | 1.446 | 1.427 | 1.395 |
| 340 | 1.469 | 1.457 | 1.446 | 1.427 | 1.394 |
| 402 | 1.435 | 1.424 | 1.414 | 1.396 | 1.365 |
| 343 | 1.430 | 1.419 | 1.409 | 1.390 | 1.359 |
| 411 | 1.423 | 1.412 | 1.402 | 1.384 | 1.352 |
| 400 | 1.419 | 1.408 | 1.398 | 1.380 | 1.348 |
| 412 | 1.419 | 1.408 | 1.398 | 1.380 | 1.349 |
| 410 | 1.403 | 1.392 | 1.382 | 1.364 | 1.332 |
| 413 | 1.391 | 1.381 | 1.371 | 1.354 | 1.324 |
| 421 | 1.375 | 1.365 | 1.355 | 1.337 | 1.307 |
| 344 | 1.372 | 1.361 | 1.352 | 1.334 | 1.305 |
| 422 | 1.372 | 1.361 | 1.352 | 1.334 | 1.304 |
| 404 | 1.359 | 1.348 | 1.339 | 1.323 | 1.294 |
| 420 | 1.357 | 1.347 | 1.337 | 1.320 | 1.289 |

|     |       |       |       |       |       |
|-----|-------|-------|-------|-------|-------|
| 423 | 1.347 | 1.337 | 1.327 | 1.311 | 1.282 |
| 414 | 1.344 | 1.334 | 1.325 | 1.309 | 1.281 |
| 431 | 1.306 | 1.296 | 1.286 | 1.270 | 1.241 |
| 424 | 1.304 | 1.294 | 1.286 | 1.270 | 1.242 |
| 432 | 1.303 | 1.293 | 1.284 | 1.267 | 1.238 |
| 430 | 1.291 | 1.280 | 1.271 | 1.254 | 1.225 |
| 433 | 1.282 | 1.272 | 1.263 | 1.247 | 1.219 |
| 434 | 1.245 | 1.235 | 1.227 | 1.211 | 1.185 |
| 441 | 1.225 | 1.215 | 1.206 | 1.190 | 1.163 |
| 442 | 1.222 | 1.212 | 1.204 | 1.188 | 1.161 |
| 440 | 1.212 | 1.202 | 1.193 | 1.178 | 1.150 |
| 443 | 1.204 | 1.195 | 1.186 | 1.171 | 1.145 |
| 444 | 1.174 | 1.165 | 1.156 | 1.142 | 1.116 |

**Supplementary Table 6.** D-spacings in [Å] of the monoclinic m32\*-Si structure at various pressures calculated using the appropriate reflection conditions<sup>2</sup>.

| space group C2<br>(hkl) | 0 GPa | 2 GPa | 4 GPa | 8 GPa | 16 GPa |
|-------------------------|-------|-------|-------|-------|--------|
| 001                     | 9.439 | 9.376 | 9.320 | 9.223 | 9.074  |
| 002                     | 4.719 | 4.688 | 4.660 | 4.612 | 4.537  |
| 110                     | 4.698 | 4.661 | 4.627 | 4.567 | 4.468  |
| 111                     | 3.559 | 3.533 | 3.509 | 3.468 | 3.400  |
| 200                     | 3.331 | 3.306 | 3.284 | 3.245 | 3.181  |
| 020                     | 3.313 | 3.285 | 3.260 | 3.214 | 3.138  |
| 003                     | 3.146 | -     | 3.107 | 3.074 | 3.025  |
| 021                     | 3.126 | 3.100 | 3.077 | 3.035 | 2.965  |
| 112                     | 2.721 | 2.702 | 2.685 | 2.655 | 2.607  |
| 022                     | 2.712 | 2.690 | 2.671 | 2.637 | 2.581  |
| 201                     | 2.615 | 2.597 | 2.580 | 2.551 | 2.504  |
| 004                     | 2.360 | 2.344 | 2.330 | 2.306 | 2.269  |
| 220                     | 2.349 | 2.330 | 2.314 | 2.284 | 2.234  |
| 023                     | 2.281 | 2.264 | 2.249 | 2.222 | 2.178  |
| 113                     | 2.164 | 2.149 | 2.136 | 2.112 | 2.075  |
| 202                     | 2.110 | 2.095 | 2.082 | 2.059 | 2.023  |
| 310                     | 2.105 | 2.090 | 2.075 | 2.050 | 2.009  |
| 130                     | 2.096 | 2.079 | 2.063 | 2.035 | 1.987  |
| 221                     | 2.053 | 2.037 | 2.023 | 1.998 | 1.957  |
| 131                     | 1.957 | 1.941 | 1.927 | 1.901 | 1.858  |
| 024                     | 1.922 | 1.908 | 1.896 | 1.874 | 1.838  |
| 311                     | 1.813 | 1.800 | 1.789 | 1.768 | 1.734  |
| 114                     | 1.783 | 1.771 | 1.760 | 1.741 | 1.711  |
| 222                     | 1.779 | 1.766 | 1.755 | 1.734 | 1.700  |
| 132                     | 1.775 | 1.761 | 1.749 | 1.727 | 1.690  |
| 203                     | 1.752 | 1.740 | 1.730 | 1.711 | 1.682  |
| 400                     | 1.665 | 1.653 | 1.642 | 1.623 | 1.590  |
| 040                     | 1.656 | 1.642 | 1.630 | 1.607 | 1.569  |
| 041                     | 1.632 | 1.618 | 1.606 | 1.583 | 1.546  |
| 133                     | 1.590 | 1.577 | 1.567 | 1.547 | 1.516  |
| 312                     | 1.571 | 1.560 | 1.550 | 1.533 | 1.504  |
| 330                     | 1.566 | 1.554 | 1.542 | 1.522 | 1.489  |
| 042                     | 1.563 | 1.550 | 1.538 | 1.518 | 1.483  |
| 223                     | 1.549 | 1.538 | 1.528 | 1.510 | 1.482  |
| 204                     | 1.492 | 1.482 | 1.473 | 1.457 | 1.433  |
| 420                     | 1.488 | 1.477 | 1.467 | 1.448 | 1.419  |
| 240                     | 1.483 | 1.471 | 1.460 | 1.440 | 1.407  |
| 401                     | 1.472 | 1.462 | 1.452 | 1.435 | 1.408  |
| 043                     | 1.466 | 1.454 | 1.443 | 1.424 | 1.393  |
| 331                     | 1.434 | 1.423 | 1.413 | 1.395 | 1.366  |
| 134                     | 1.419 | 1.408 | 1.399 | 1.382 | 1.355  |
| 241                     | 1.399 | 1.388 | 1.378 | 1.360 | 1.329  |
| 313                     | 1.376 | 1.366 | 1.358 | 1.342 | 1.318  |
| 224                     | 1.361 | 1.351 | 1.342 | 1.327 | 1.303  |
| 044                     | 1.356 | 1.345 | 1.336 | 1.319 | 1.290  |
| 421                     | 1.345 | 1.335 | 1.326 | 1.311 | 1.285  |

|     |       |       |       |       |       |
|-----|-------|-------|-------|-------|-------|
| 402 | 1.308 | 1.298 | 1.290 | 1.276 | 1.252 |
| 332 | 1.305 | 1.295 | 1.286 | 1.271 | 1.245 |
| 242 | 1.303 | 1.293 | 1.283 | 1.267 | 1.240 |
| 314 | 1.218 | 1.210 | 1.202 | 1.189 | 1.168 |
| 422 | 1.216 | 1.208 | 1.200 | 1.186 | 1.163 |
| 243 | 1.204 | 1.195 | 1.186 | 1.171 | 1.147 |
| 333 | 1.186 | 1.178 | 1.170 | 1.156 | 1.133 |
| 440 | 1.174 | 1.165 | 1.157 | 1.142 | 1.117 |
| 403 | 1.170 | 1.162 | 1.154 | 1.142 | 1.121 |
| 244 | 1.109 | 1.100 | 1.093 | 1.080 | 1.058 |
| 423 | 1.103 | 1.095 | 1.088 | 1.076 | 1.056 |
| 441 | 1.100 | 1.092 | 1.084 | 1.071 | 1.048 |
| 334 | 1.081 | 1.073 | 1.066 | 1.053 | 1.034 |
| 404 | 1.055 | 1.048 | 1.041 | 1.030 | 1.011 |
| 442 | 1.026 | 1.019 | 1.012 | 0.999 | 0.979 |
| 424 | 1.005 | 0.998 | 0.992 | 0.980 | 0.963 |
| 443 | 0.956 | 0.949 | 0.942 | 0.931 | 0.912 |
| 444 | 0.890 | 0.883 | 0.877 | 0.867 | 0.850 |

## Supplementary Notes

### Supplementary Note 1 | Estimation of maximum pressure, temperature and the cooling and depressurisation time in the laser absorbed volume

We note that the Young's moduli in Si and silica are respectively 165 GPa and 78 GPa. Therefore, shock wave propagation and its termination occur in both materials in different time and space regimes, resulting in significant asymmetry of the void and shock-affected areas. As a result, the expanding shock front is distorted by perturbations due to this asymmetry, also enhanced by hydrodynamic instabilities. Such processes make accurate predictions of the shape and spatial pressure/temperature distribution in the laser/shock affected material very difficult. However, the average size of the void, maximum temperature and pressure, shock-wave propagation distance, cooling and pressure release times can be reasonably estimated on the basis of the energy and mass conservation laws.

Irradiation of the Si-surface in the current experiments with tightly focused 170 fs, 800 nm laser pulses at two energy density levels of  $F = 60 \text{ J cm}^{-2}$  (laser energy 250 nJ) and  $95 \text{ J cm}^{-2}$  (laser energy 440 nJ) produces the following conditions in the laser-affected Si and SiO<sub>2</sub> presented in Supplementary Figure 2. The ionisation threshold (optical breakdown) is determined by the condition that the real part of dielectric permittivity turns to zero,  $\text{Re}(\varepsilon) = 0$  as a result of laser excitation.<sup>3,4</sup> The ionisation threshold in Si ( $0.034 \text{ J cm}^{-2}$ ) is lower than that in SiO<sub>2</sub> ( $0.1 \text{ J cm}^{-2}$ ).<sup>4</sup> Therefore, silicon starts to absorb laser energy earlier in the pulse time. Both Si and O are ionised in a  $l_{abs} \sim 23\text{-nm}$  thin layer adjacent to the Si/SiO<sub>2</sub> interface where about  $A = 50\%$  of the laser energy is absorbed.

The absorbed energy density  $E_{abs} = 2AF/l_{abs}$  (absorption coefficient and absorption depth,  $A \cong 0.5$ ;  $l_{abs} \cong 2.3 \times 10^{-6} \text{ cm}$ ) constitutes  $21 \text{ MJ cm}^{-3}$  ( $F = 60 \text{ J cm}^{-2}$ ) and  $40 \text{ MJ cm}^{-3}$  ( $F = 95 \text{ J cm}^{-2}$ ), suggesting a maximum electron pressure in the range of 20 – 40 TPa. The major part of the absorbed energy is contained within the SiO<sub>2</sub>-volume where the degree of ionisation is  $\sim 1\text{-}2$ , i.e. one or two electrons are stripped from the O and Si atoms. Thus, from the conservation of energy, the maximum energy per atom is in the range 150 eV – 300 eV, which corresponds, by taking into account the ionisation losses, to a maximum electron temperature in the range 50-100 eV.

The rate of electron-ion energy transfer,  $\nu_{en}$ , is inversely proportional to the ion's mass,  $\nu_{en} = \nu_{mom} (m_e/M_i)$ , where the momentum exchange rate equals  $\nu_{mom} \sim 5 \times 10^{15} \text{ s}^{-1}$ .<sup>5,6</sup> For this reason O-ions equilibrate their temperature with electrons faster than the Si-ions,  $t_O = (\nu_{en}^O)^{-1} = 2.1 \text{ ps}$  after the pulse, while in Si  $t_{Si} = (\nu_{en}^{Si})^{-1} = 3.7 \text{ ps}$  ( $M_O = 16$ ,  $M_{Si} = 28$ ). Since the O-ions are in motion earlier than the Si-ions, a two-step shock wave emerges from the laser-heated layer at the Si/SiO<sub>2</sub> interface. One may conjecture that the initial shock-wave driven by O in the SiO<sub>2</sub> is the reason for the appearance of the peculiar shape of the void with a bubble-like structure on the top (see Fig.S2).

The shock wave propagates into the bulk, dissipates the energy, and converts to an acoustic wave at a distance where the pressure at the shock front is reduced to the Young's modulus.<sup>7,8</sup> Taking the Young's modulus of SiO<sub>2</sub> as  $\sim 75 \text{ GPa}$ , this distance is  $r_{SW}^{SiO_2} \sim 0.91 \text{ }\mu\text{m}$  for 250 nJ and  $\sim 1.1 \text{ }\mu\text{m}$  for 440 nJ, respectively. The radius of the equivalent sphere is  $\sim 0.3 \text{ }\mu\text{m}$  (void volume  $0.034 \text{ }\mu\text{m}^3$ ) for 250 nJ and  $0.38 \text{ }\mu\text{m}$  (void volume  $0.063 \text{ }\mu\text{m}^3$ ) for 440 nJ, which is in close agreement with the volume of the voids in SiO<sub>2</sub> observed in the experiments,  $\sim 0.027 \text{ }\mu\text{m}^3$  and  $\sim 0.055 \text{ }\mu\text{m}^3$ , respectively (see Supplementary Figure 2). Similar estimates for propagation distance in Si yields  $r_{SW}^{Si} \sim 680 \text{ nm}$  for 250 nJ and  $\sim 800 \text{ nm}$  for 440 nJ respectively, which is reasonably close to the values observed in experiments.

Let us define de-pressurisation time as a moment when the pressure reduces to the cold pressure, i.e. the Young's modulus in a particular material. Assuming that the shock wave (SW) front velocity quickly reduces to the sound velocity one may estimate that time as  $r_{stop}/v_{sound}$ , where  $r_{stop}$  is the distance the SW propagates before converting into an acoustic wave. Taking the speed of sound in Si ( $v_{Si} = 8.5 \times 10^5$  cm/s) and in SiO<sub>2</sub> ( $v_{SiO_2} = 5 \times 10^5$  cm/s) one obtains the respective times of  $\sim 0.08$ – $0.1$  ns in Si and  $0.17$ – $0.22$  ns in SiO<sub>2</sub>. The average temperature at that moment can be estimated assuming that a material has a solid-state atomic number density ( $n_a = 5 \times 10^{22}$  cm<sup>-3</sup>) and the recombination took place during shock-wave propagation consuming an energy necessary for making bonds of the order of the ionization potential  $\sim 10$  eV. The heat capacity is also changing with temperature from  $1.5 k_B$  as for an ideal gas to  $3k_B$  of a solid. Thus, it is reasonable to assume that the average temperature at the time the shock wave stops is around 11,000K, and the density is the same order as in the surrounding pristine crystal. The pressure at the moment of termination of the shock wave is equal to the Young modulus of the surrounding pristine material, but the material is still in a partially ionised plasma state with the degree of ionisation  $\sim 10\%$ .

The isochoric cooling is a continuous process but the rate of cooling has several stages, each attributed to a particular diffusivity. Each stage is characterised by a different diffusivity coefficient, which is temperature-dependent. The first stage is while the shock wave propagation continues. In this stage cooling from the hot dense plasma state is due to electronic heat conduction with the heat diffusion coefficient,  $D = v_e^2/3\eta$ , where  $v_e \sim 2 \times 10^8$  cm s<sup>-1</sup> is the electron velocity and the collision rate is  $\nu_e \sim 5 \times 10^{15}$  s<sup>-1</sup>, so  $D = 2.7$  cm<sup>2</sup> s<sup>-1</sup>. Taking the shock-wave propagation distance as  $L \sim 800$  nm and suggesting that the heat wave moves the same distance, the resulting cooling time is  $t_{cool} = L^2/D \sim 1.8$  ns and the temperature at the end of the first stage equals  $\sim 1.5$  eV, qualitatively comparable with the above estimate of the cooling during the shock deceleration and stopping. At 1.5 eV the electronic heat conduction is still efficient. One obtains  $D \sim 0.24$  cm<sup>2</sup> s<sup>-1</sup> for the second stage when the heat wave propagates further into the bulk. The temperature drops down from 1.5 eV to  $\sim 0.19$  eV ( $\sim 2000$ K) when the heat wave propagates over another 800 nm during 27 ns. The last stage is cooling by conventional linear heat conduction. The drop of temperature from 2000 K to 300 K requires an increase of volume by 6.7 times, which means the heat wave propagates further by  $\sim 1.88$   $\mu$ m. Taking the diffusivity in SiO<sub>2</sub> as  $D_{SiO_2} = 4.76 \times 10^{-3}$  cm<sup>2</sup> s<sup>-1</sup>, the time required for propagating this distance and cooling down to room temperature is  $\sim 5.2$   $\mu$ s.

The last estimate can be modified for the heat wave propagating in Si. The major difference is in the cooling rate at the third stage because the heat diffusivity in Si is two orders of magnitude higher than that in SiO<sub>2</sub>,  $D_{Si} = 0.5$  cm<sup>2</sup> s<sup>-1</sup>. Hence the cooling time in Si becomes significantly shorter to  $\sim 50$  ns.



**Supplementary Note 2 | Range of laser fluences used for the formation of tetragonal phases of Si**

Qualitatively, the level of laser fluence on the Si surface buried under the SiO<sub>2</sub> layer should be sufficient to create a plasma and generate a strong shock-wave with a maximum pressure above the Young's modulus of silicon,  $Y \sim 165$  GPa. The formation of a void in the Si bulk by the following rarefaction wave is an indication that a maximum pressure above  $Y$  has been achieved. In our experimental conditions with single 170 fs laser pulses focused onto a Si surface down to a 0.74  $\mu\text{m}$  (FWHM) diameter spot, the formation of voids commences at a laser pulse energy of  $\sim 5$  nJ, which generates a fluence of  $\sim 2$  J cm<sup>-2</sup>. At this near-threshold laser fluence the shock-wave affected areas are very thin (less than 100 nm thick), and contain only a thin layer of amorphous Si (Supplementary Figure 3a) presumably due to very fast quenching and lacking time for nucleation of any crystal structure.

Further increase of the laser energy demonstrates the extension of voids into the SiO<sub>2</sub> above the Si surface due to the ionisation wave propagation into the SiO<sub>2</sub> – see Supplementary Figure 3. The shock wave also propagates up to 600 nm into the bulk of the Si at a laser fluence of  $\sim 150$  J cm<sup>-2</sup> (pulse energy  $\sim 600$  nJ). Further increase of the laser energy leads to the formation of a void in SiO<sub>2</sub> further and further away from the Si surface. This results in reduced shock-wave propagation into the Si. Analysis of the shock-wave affected areas in Si from TEM images indicate that the new tetragonal phases bt8-Si and st12-Si, as well as t32-Si were found at a specific range of laser fluences from  $\sim 40$  J cm<sup>-2</sup> to  $150$  J cm<sup>-2</sup> (pulse energy  $\sim 100$  nJ – 600 nJ).

### Supplementary References

1. Pickard C. J., and Needs R. J. Ab initio random structure searching. *J. Phys.: Condens. Matter* **23**, 053201 (2011).
2. Aroyo M. I., Perez-Mato J. M., Capillas C., Kroumova E., Ivantchev S., Madariaga G., Kirov A., Wondratsche H., "Bilbao Crystallographic Server I: Databases and crystallographic computing programs, *Z. Krist.* **221**, 15-27 (2006). [doi:10.1524/zkri.2006.221.1.15](https://doi.org/10.1524/zkri.2006.221.1.15).
3. Sokolowski-Tinten, K. and von der Linde, D. Generation of dense electron-hole plasmas in silicon, *Phys. Rev. B* **61**, 2643-2650 (2000).
4. E. G. Gamaly and A. V. Rode, Transient optical properties of dielectrics and semiconductors excited by an ultrashort laser pulse, *Journ. Opt. Soc. Am. B* **31**, C36-C43 (2014).
5. P. B. Allen. Theory of thermal relaxation of electrons in metals. *Phys. Rev. Lett.* **59** 1460-1463 (1987).
6. E. G. Gamaly, A. V. Rode, Physics of ultra-short laser interaction with matter: From phonon excitation to ultimate transformations, *Progress in Quantum Electronics* **37**, 215-323 (2013).
7. Juodkazis, S., Misawa H., Gamaly E. G., Luther-Davies B., Hallo L., Nicolai P., Tikhonchuk V. T., Laser-induced microexplosion confined in the bulk of a sapphire crystal: Evidence of multimegabar pressures. *Phys. Rev. Lett.* **96**, 166101 (2006).
8. Gamaly E. G., Juodkazis S., Misawa H., Luther-Davies B., Hallo L., Nicolai P., Tikhonchuk V. T., Laser-matter interaction in the bulk of a transparent solid: Confined microexplosion and void formation. *Phys. Rev. B* **73**, 214101 (2006).
